# Supplementary material for: Interleukin 10 controls the balance between tolerance, pathogen elimination, and immunopathology in birds
Source: eLife journal article supplement (doi:10.7554/elife.106252), 2025-05-07
Supplement: fig1-figsupp4-data1 [file Figure 1-figure supplement 4-source data 1.pdf › Figure 1-figure supplement 4-source data 1/Figure 1-figure supplement 4-source data 1.pdf]

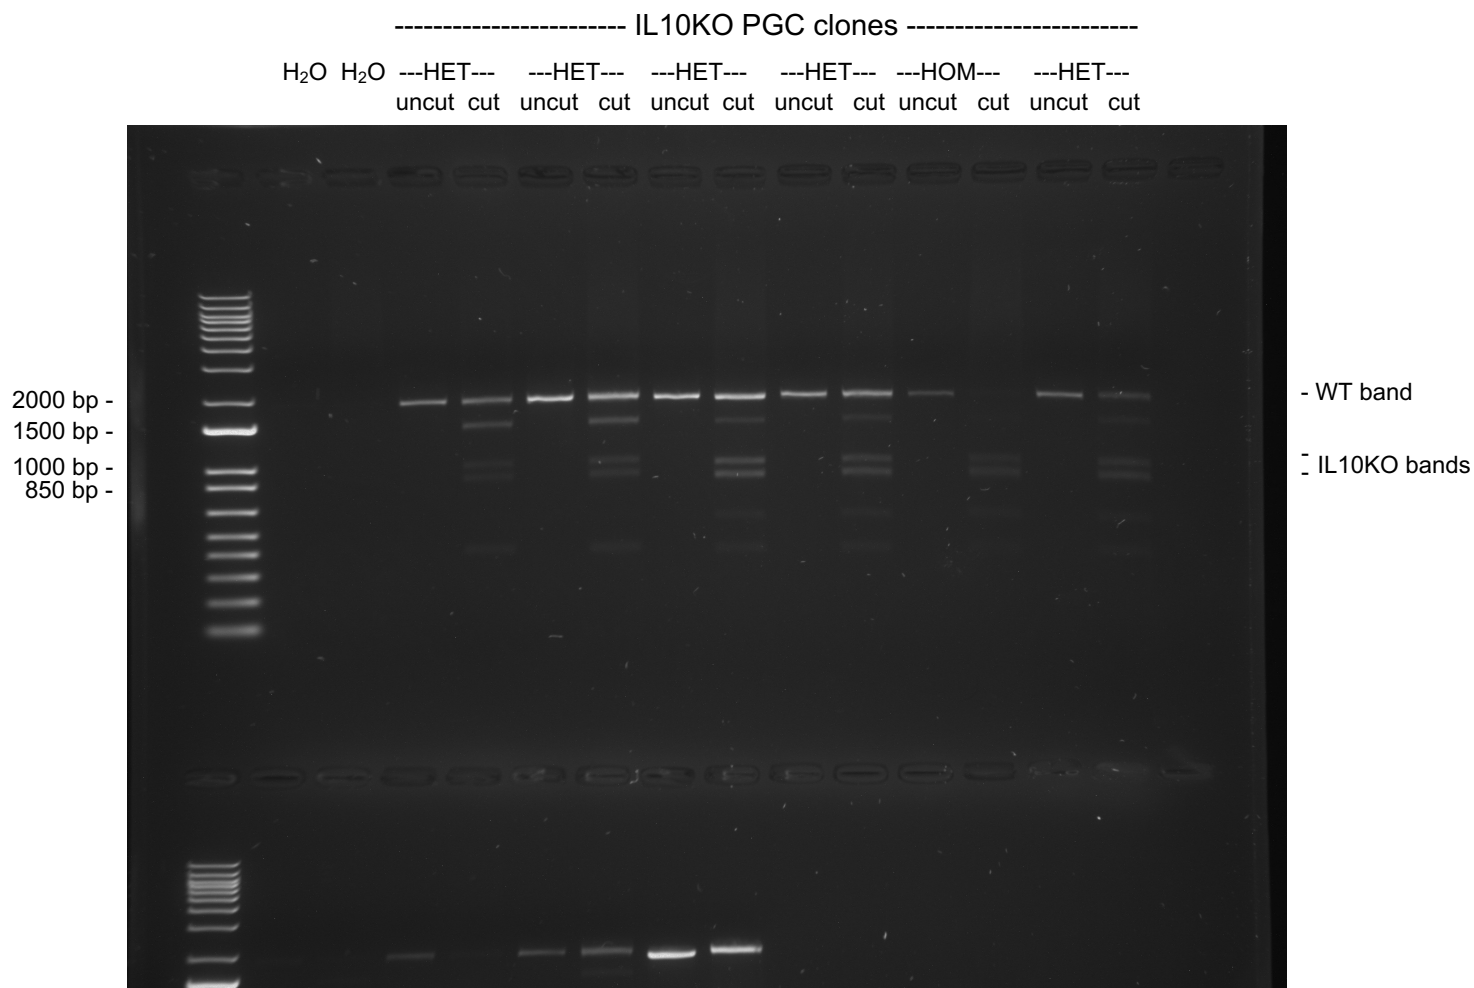

**Figure 1—figure supplement 4—source data 1—panel A:** Annotated raw, unedited and uncropped agarose gel image corresponding to Figure 1—figure supplement 4A, with the relevant bands clearly labelled.

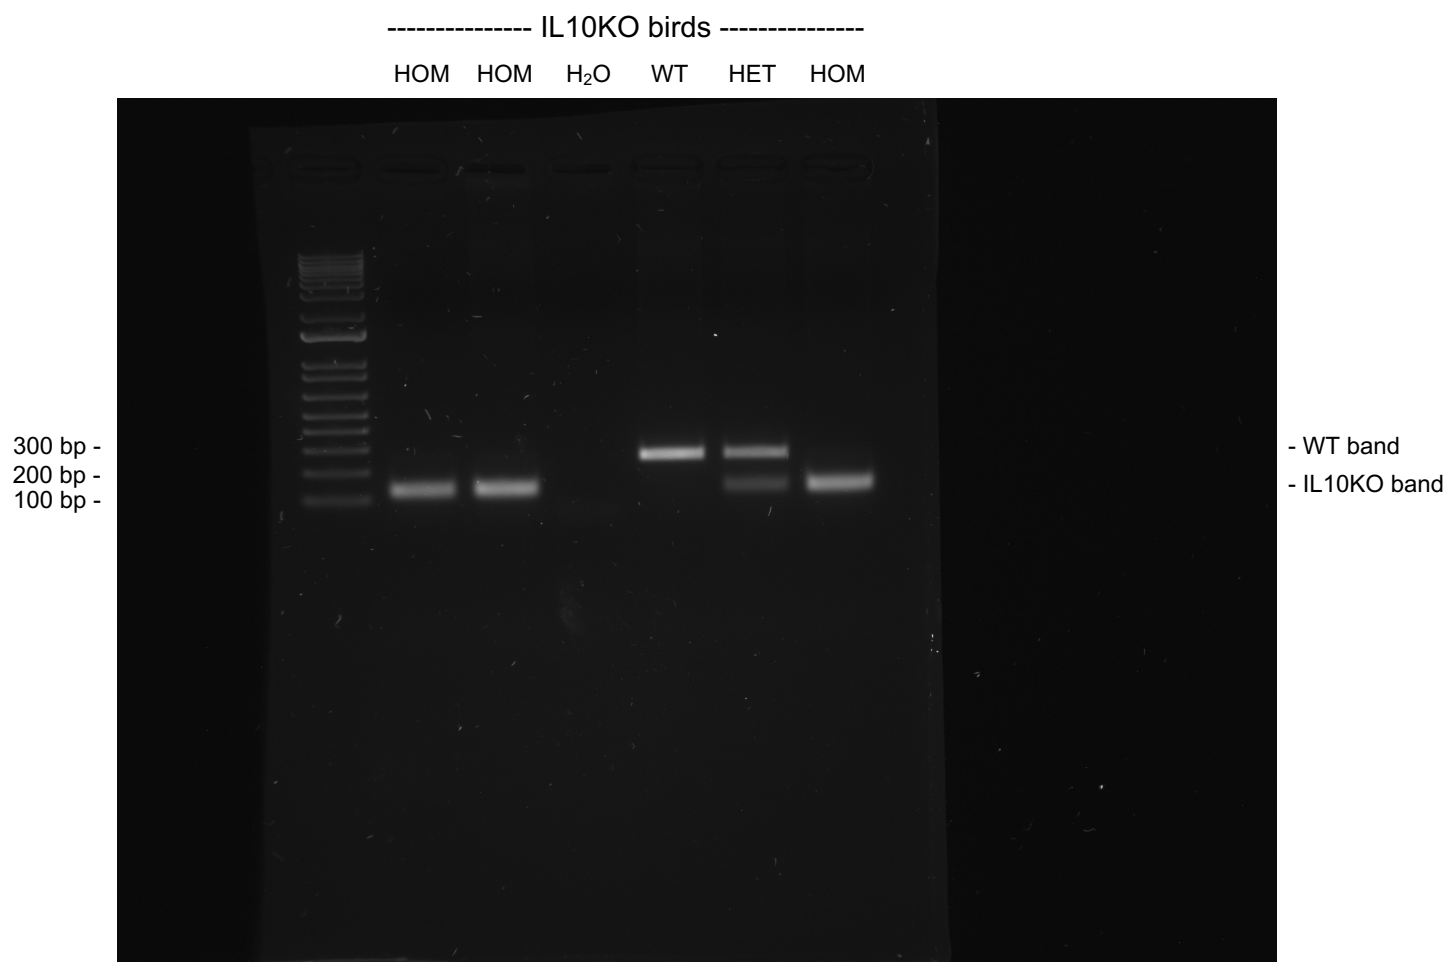

**Figure 1—figure supplement 4—source data 1—panel B:** Annotated raw, unedited and uncropped agarose gel image corresponding to Figure 1—figure supplement 4B, with the relevant bands clearly labelled.

----- IL10EnKO PGC clones -----  
HOM WT WT WT WT HET HET H<sub>2</sub>O

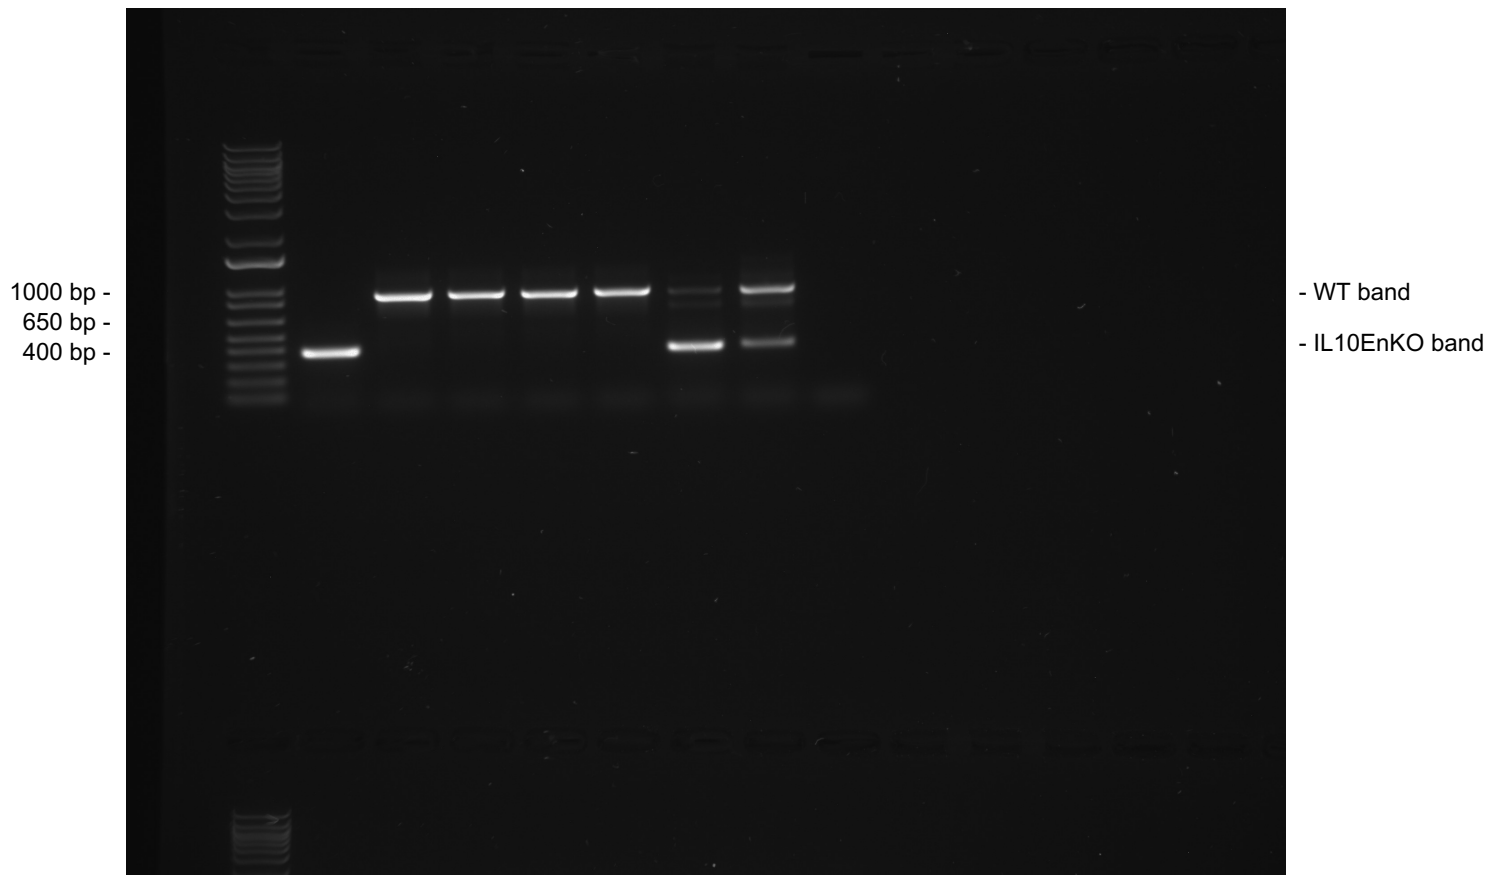

**Figure 1—figure supplement 4—source data 1—panel C:** Annotated raw, unedited and uncropped agarose gel image corresponding to Figure 1—figure supplement 4C, with the relevant bands clearly labelled.

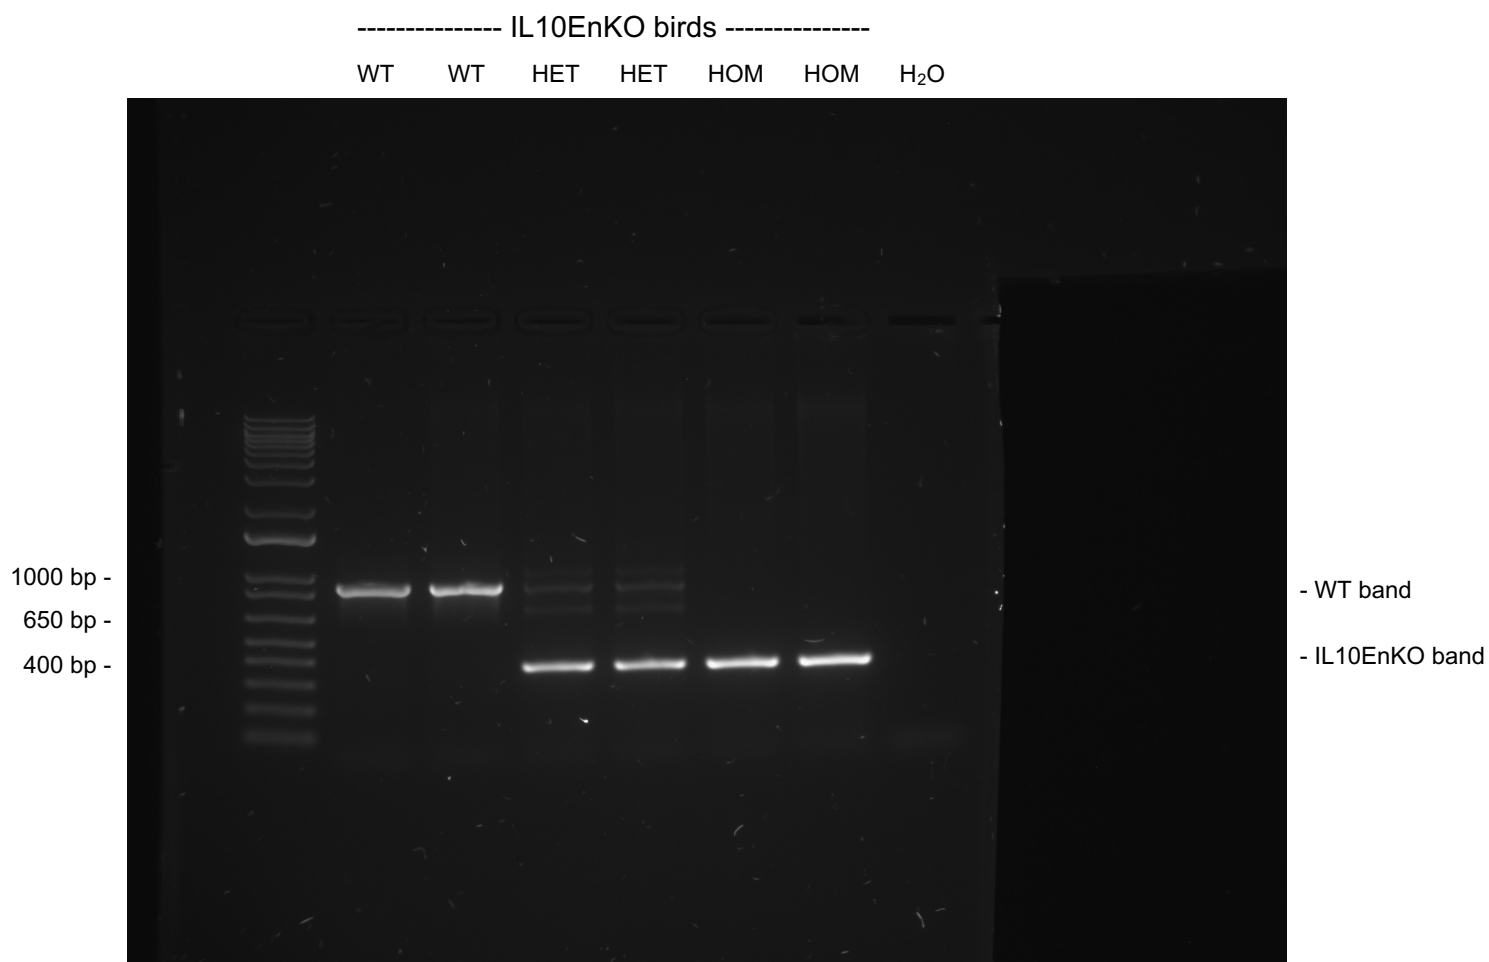

**Figure 1—figure supplement 4—source data 1—panel D:** Annotated raw, unedited and uncropped agarose gel image corresponding to Figure 1—figure supplement 4D, with the relevant bands clearly labelled.
